# Supplementary material
Source: Springer Nature journal article supplement (https://www.springermedizin.de/resource/supplementary/12937_2013_719_MOESM1_ESM.pdf/25653686)
Supplement: MOESM1 [file 25653686]

CAD subjects who were treated with  
statins for at least 1 month (n = 51)

Randomized

Placebo (n = 24)

Q10-300 (n = 27)

12 weeks

Lost to follow up (n = 5)

Lost to follow up (n = 4)

Completed (n = 19)

Completed (n = 23)
